# Supplementary figures and images for: Alignment-free construction of double emulsion droplet generation devices incorporating surface wettability contrast
Source: Royal Society of Chemistry journal article supplement (doi:10.1039/d3lc00584d), 2023-01-01

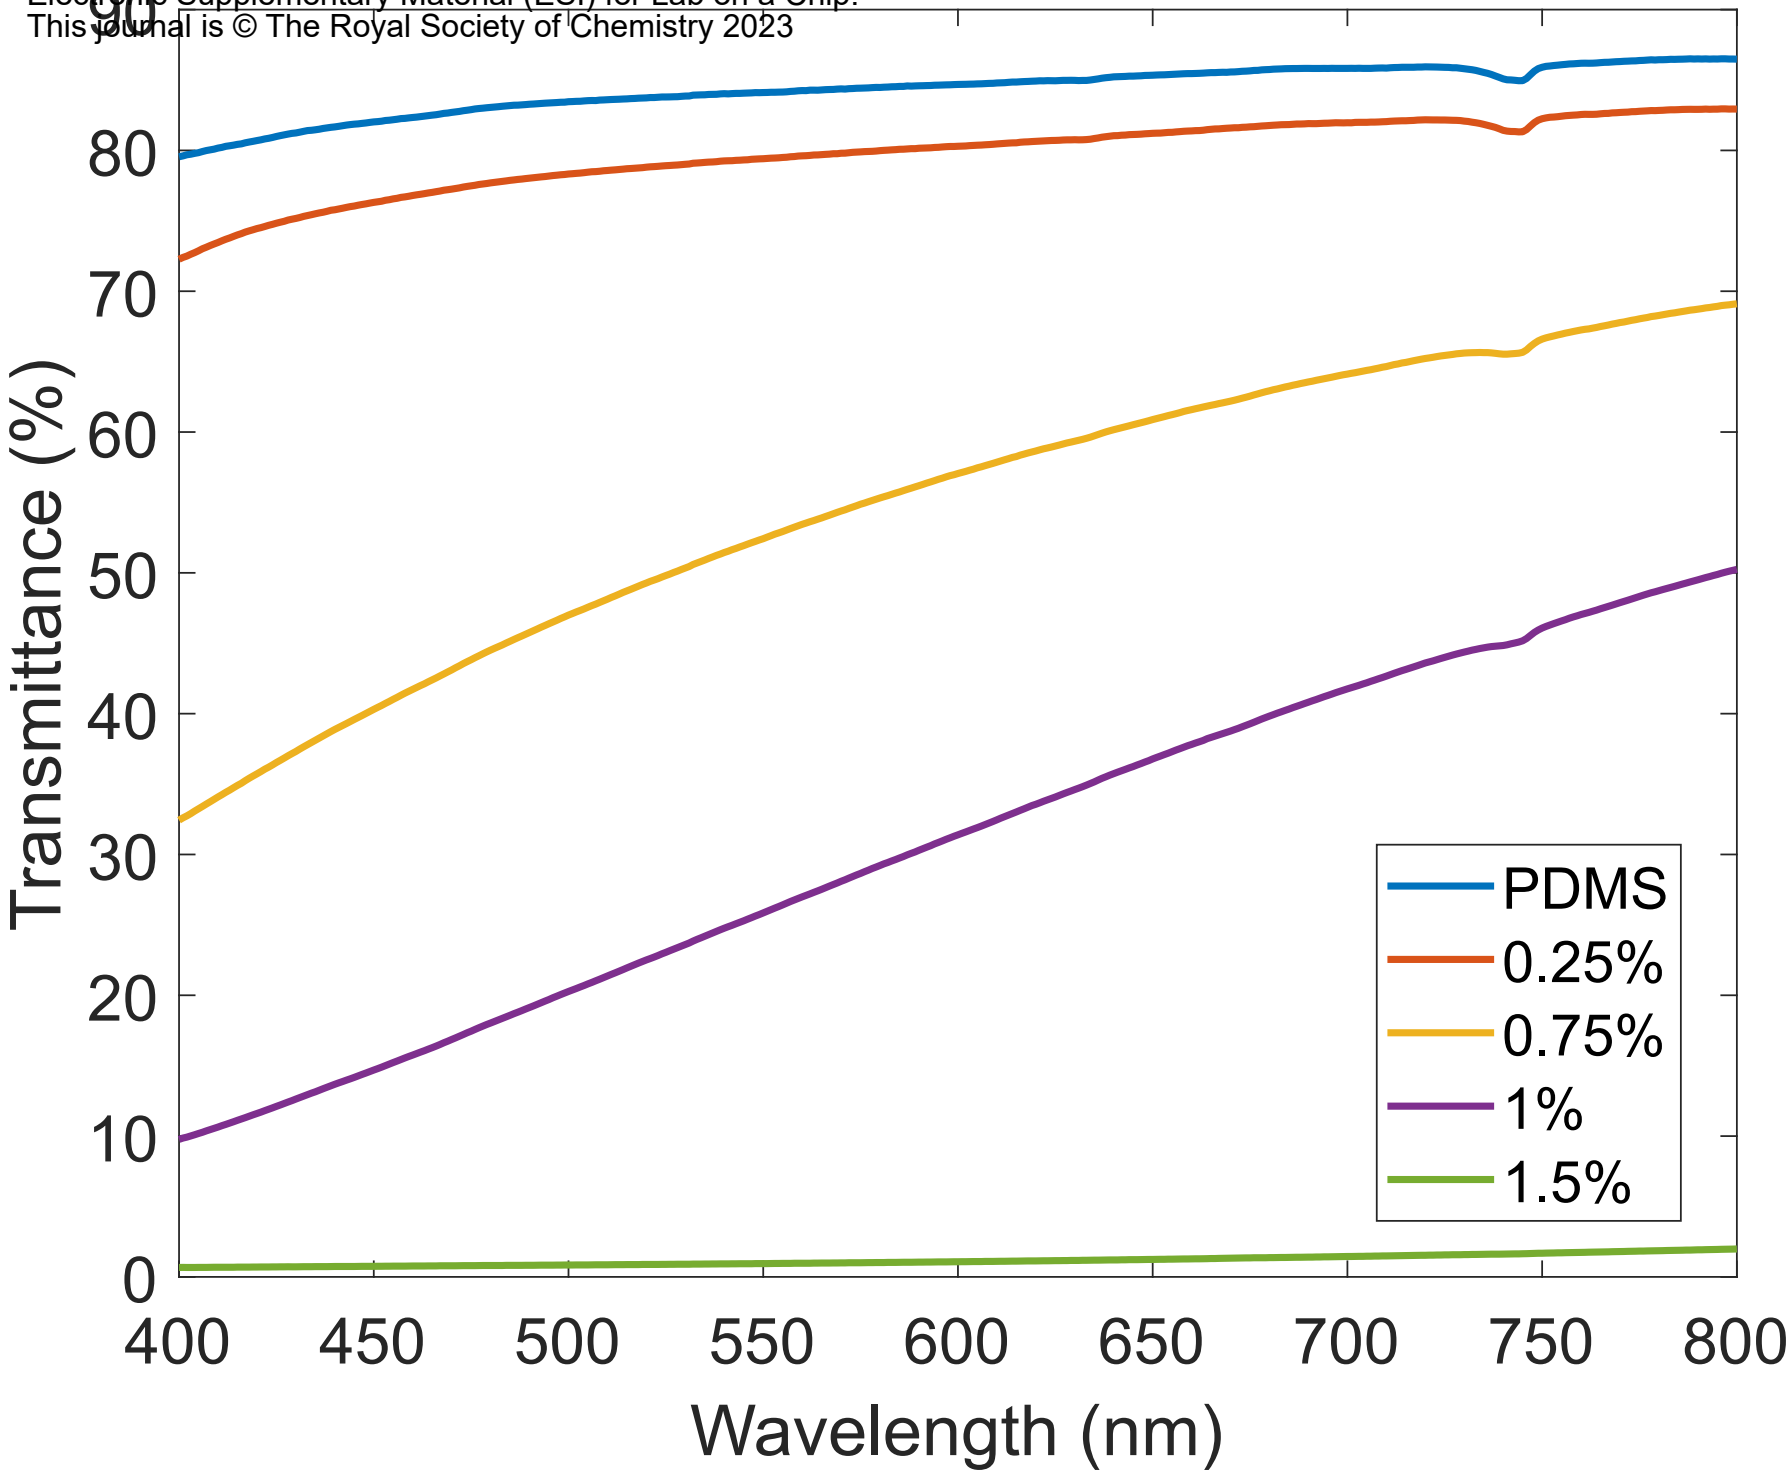

Supplement: d3lc00584d5.pdf [file d3lc00584d5.pdf]

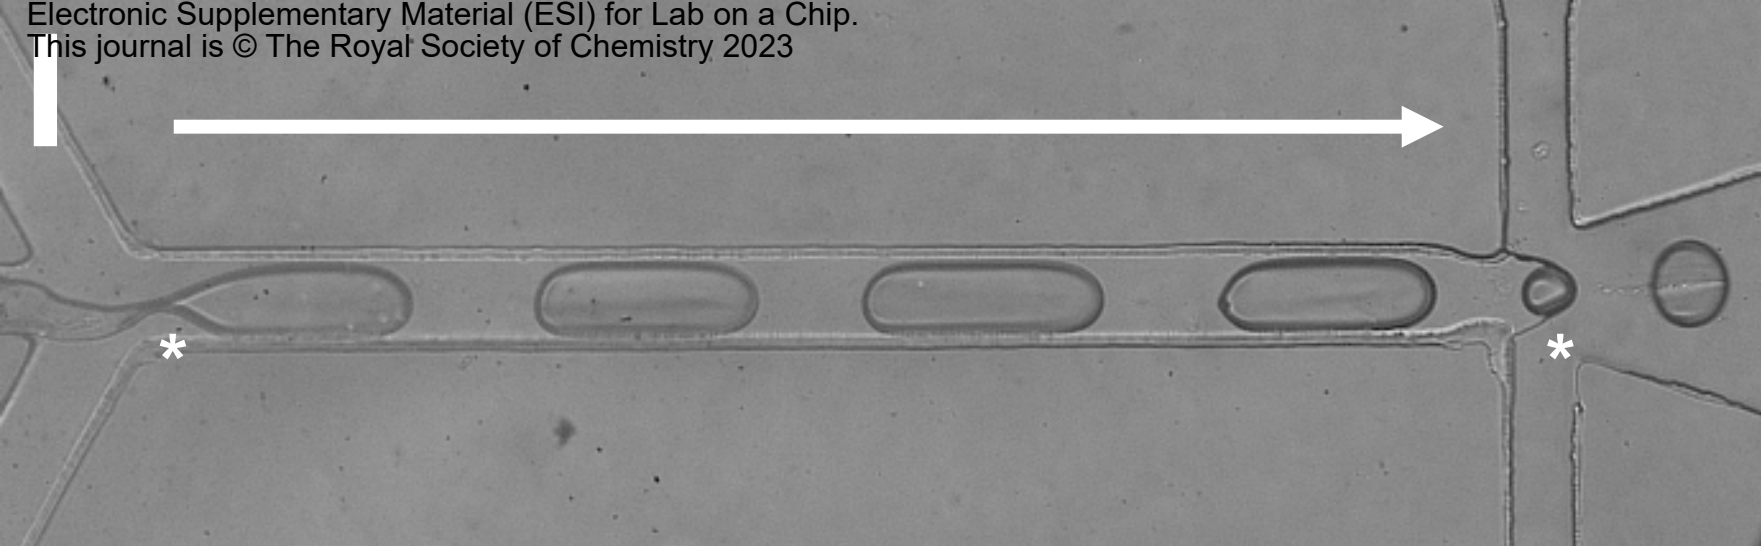

Supplement: d3lc00584d6.pdf [file d3lc00584d6.pdf]

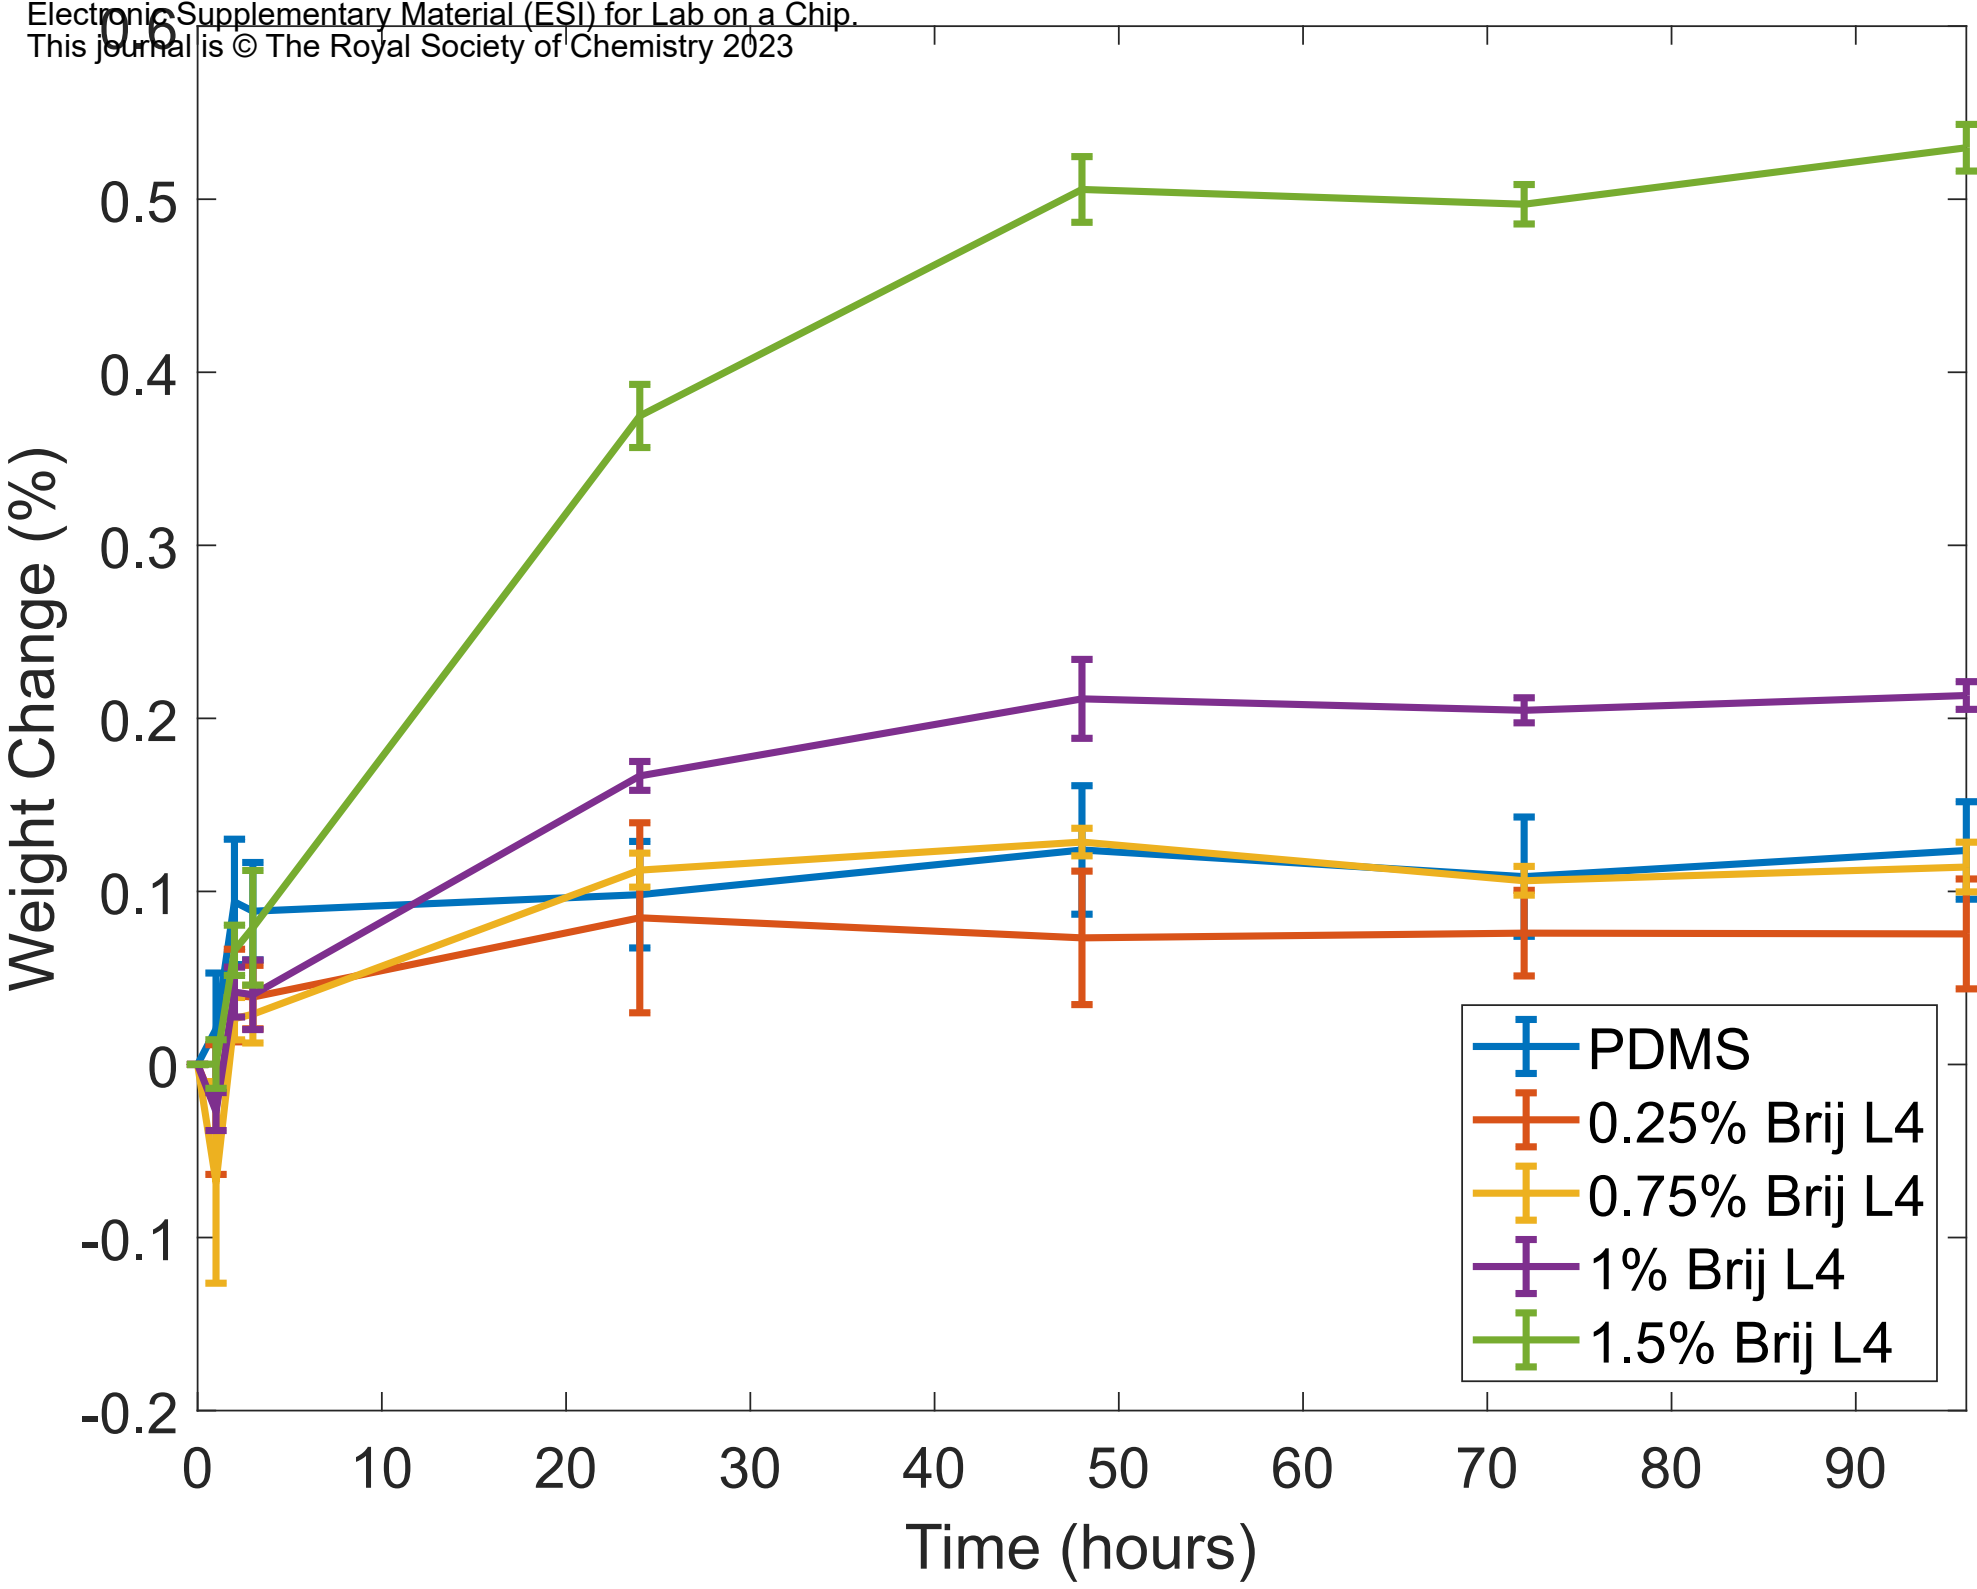

Supplement: d3lc00584d7.pdf [file d3lc00584d7.pdf]

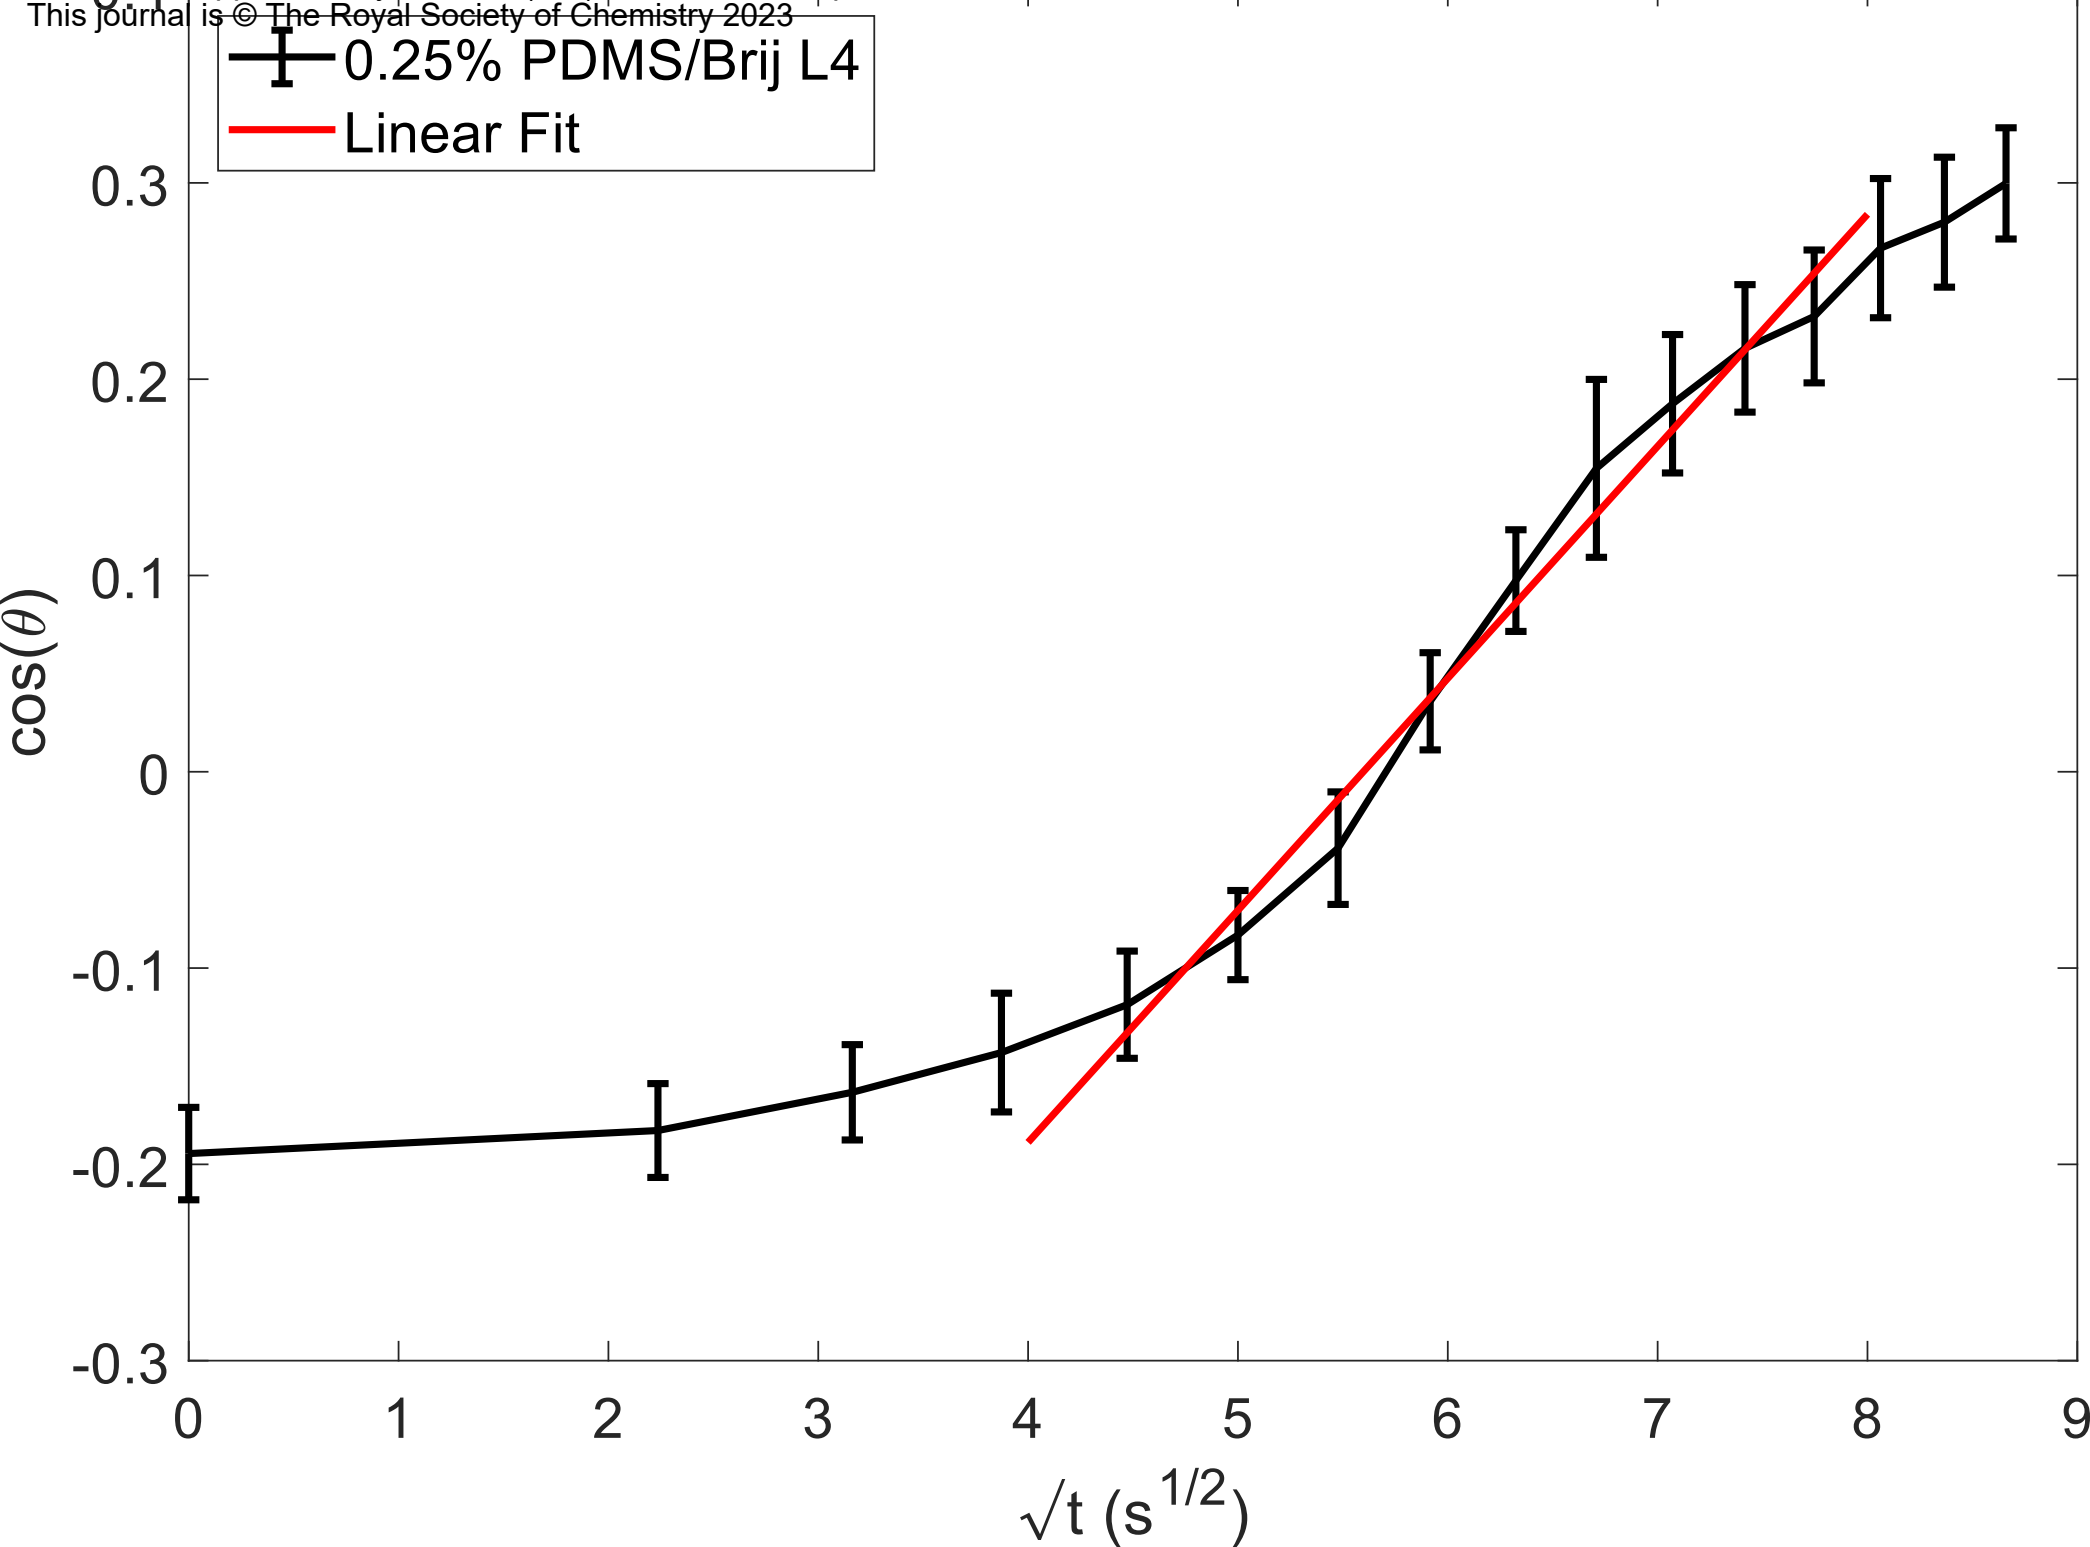

Supplement: d3lc00584d8.pdf [file d3lc00584d8.pdf]
